# Supplementary material
Source: PubMed Central journal article supplement (PMC3954597)
Supplement: NIHMS554338-supplement-1_si_001.pdf [file NIHMS554338-supplement-1_si_001.pdf]

## Diverse Levels of Sequence Selectivity and Catalytic Efficiency of Protein-Tyrosine Phosphatases

Nicholas G. Selner,<sup>†</sup> Rinrada Luechapanichkul,<sup>†</sup> Xianwen Chen,<sup>†</sup> Benjamin G. Neel,<sup>‡</sup> Zhong-Yin Zhang,<sup>‡</sup>  
Stefan Knapp,<sup>§</sup> Charles E. Bell,<sup>±</sup> and Dehua Pei<sup>\*,†</sup>

### Supporting Information

Table S1. Peptide Library Screening Conditions

| PTP   | Peptide Library | [PTP] (nM) | PTP Reaction Time (min) |
|-------|-----------------|------------|-------------------------|
| HePTP | II              | 500        | 10                      |
|       | IV              | 2          | 10                      |
| PEST  | I               | 1          | 15                      |
|       | III             | 1          | 15                      |
|       | V               | 1          | 15                      |
| PTPH1 | II              | 50         | 15                      |
|       | III             | 50 - 100   | 15                      |
| TCPTP | I               | 5          | 15                      |
|       | III             | 10         | 15                      |
|       | IV              | 5          | 15                      |
| PTPD1 | III             | 500        | 60                      |
| PTPD2 | III             | 800        | 60                      |
|       | IV              | 78 - 500   | 30 - 60                 |
| PTPRB | III             | 5 - 10     | 15                      |
|       | V               | 20         | 15                      |
| PTPRC | II              | 0.1        | 5.5                     |
| PTPRD | II              | 100        | 15                      |
| PTPRO | III             | 0.5 - 1    | 5 - 15                  |
|       | V               | 2 - 10     | 15                      |

Table S2. HePTP Substrates Selected From Library II (AXXXXXXXXXpY)<sup>a</sup>

| Intensely Colored |           | Medium Colored |           |           | Lightly Colored |           |           |
|-------------------|-----------|----------------|-----------|-----------|-----------------|-----------|-----------|
| RRVFEDDD          | SDDERNND  | MSDADDEE       | PSMVDTFD  | DWDEIQEN  | XFRFQDDE        | DDGLWGTD  | WWIDD SAA |
| IEPEFDDD          | LELESNWD  | VLAVDDED       | SPVFDISD  | INAEATEW  | VEEEEAED        | EWNSNWD   | DEDEGEQRF |
| SETNIDEE          | TNSDVRTE  | QQDEWEEE       | AVSWERRD  | SDEPQSDX  | TEWDDQED        | TSPTFWPE  | DEDLDSWR  |
| NDTDEFDD          | REENFQWD  | NLDILDDD       | GFGVENAE  | DAESVVEN  | DATDEVDD        | RFAWVWRD  | EFDSDWAN  |
| AEEQENED          | ADDTRRWD  | FWPNGDDE       | XNVPDPIE  | AADFMDN   | VGAVDLDD        | TFRRQHRD  | DNDWEGAS  |
| VFGVESDE          | IDETWSPE  | GGVLD FDD      | ADEETLDD  | PNETIPEV  | SEFEFLDD        | DTALDDDP  | EDGREHGS  |
| TWVSDPDD          | XXDTQVWD  | ERGDQSDD       | DNEDNMSE  | GDWQSREW  | PPTIEWPDE       | XXXFEEDF  | FEIADSR I |
| QISGDIDE          | INETTRSD  | RASDQWED       | DDADMSRE  | STFTNSDP  | DEDFSQDD        | GVGND DDF | DMAHEVHN  |
| DEMWDQEE          | RDHANHFE  | PNSEPWED       | WDLETANE  | RSWEDDWF  | XXEITNDE        | EDDVIEDS  | ADDENSTG  |
| ADNEWFED          | SAWSPFTD  | TGFDWSDD       | ENSERWSE  | SLENEDWS  | XXSFPWDD        | ADNFIDDN  | AQDDWWRQ  |
| DWNLDNED          | VWSNAVIE  | AAWEPWDD       | SVQDWRQE  | DPWVDDQN  | QNINWQED        | VEAWNEDI  | DEDVGWQN  |
| EEDVWRDE          | AWSDDDD S | PFNDWTEE       | AGGEWISD  | APDEWDST  | IDEQEDME        | VDTPTDDT  | DDDGAWSV  |
| GDEAQFDE          | MDSIDDDT  | PDSWSPDD       | GEENWVNE  | DPWDQDNI  | FDIDSEFD        | SSNFNEDF  | GDDVNQWV  |
| GDEWRVED          | V DENNEEN | QFQVRVDD       | TWENWTND  | GFVDWEWA  | DAFDSEIE        | DVDFEQEP  | DMENHPVG  |
| DLEWGVDD          | SRDIR EEH | XXXXPTED       | RQEGARQD  | NNSWPEPT  | PNSDSEWE        | DETRDTEF  | FVDMMRMS  |
| TSDHGFED          | TESWDFES  | WFNDEDXE       | WDSSSILD  | XXNMSDGI  | NASDSEWE        | NEMPDWES  | RVEAVQNR  |
| EEWNPVDE          | REEDQWDI  | FDNLDDVD       | AIWANFPE  | FDEDDVHR  | TSDMSDVD        | XFAWDREI  | DDSNSWAR  |
| AEEWEDFE          | RLFFSRDT  | SNVWDERE       | VQFPVRHE  | EDFDDGRW  | EDSWNEPE        | SSDDNWDI  | MEGNFQRL  |
| SSNNDEAD          | DWEDEDNI  | SWVPEDTE       | THRQACVD  | NASDDQRR  | FETSQEVD        | XDSEWPEP  | SQVMAWWP  |
| QDDDWNE           | NDVWDDNL  | RNDDLEWD       | PTTHLRID  | EVTSDATS  | DGPFWEQE        | RFLEQSDG  | IGTLRNWQ  |
| EVNDWLD           | SDQDMWQ   | AVEEFDND       | RQDQDDEV  | PTSAEIIW  | XXNLSDWE        | SDDMLLDS  | PRTGQWVT  |
| AFTDSDID          | HRDAVDFV  | GEFDADVE       | DWQDFEEQ  | NWAGEFGR  | PEDDDVTD        | GDTTGTDF  | NVIGTRTX  |
| RGE SWSD          | SQDAIEIP  | FDIDQEGD       | DWQDFEEQ  | ADEDAISR  | SEEEENRE        | XXFEDD WV | XXXISVTP  |
| DDWPADSD          | SEGEDMNN  | DTLDPEWD       | SSQFWEDES | DDDSMTRGQ | AMGEDQFD        | SMDNDEQR  | XXMRLNIT  |
| IGDDESWD          | AEFDPVWN  | EAVLDLDFD      | VSNDNDEI  | SDDTRIQS  | NANEWQE         | NADGDDNL  | XXAAALRR  |
| AEEFEDITE         | NSPDQFRQ  | ELFDPDQE       | AADFMDDN  | GMDGAPQR  | XDEQDFPD        | XEIMEDNF  | HPSRPSQQ  |
| NRSD EAPD         | GEQSIVAI  | NFSEMDMD       | NEWNS EDW | PDTGSGHF  | EDVGGGFE        | DSNNDDAW  | MQAPITAG  |
| NEDSEWND          | GFHSQFVP  | XXVDS DSE      | ADWQSDDL  | VEALITGI  | TEAVEPWD        | DSNPDEIR  |           |
| RTDQDFFD          | FAATTRMN  | ADDGPDFD       | FDMSVEDQ  | EISRPHNN  | LDVFDNLE        | SVEDTDIP  |           |
| EFHSDRWD          | NVSRPNR   | SDEGSDQE       | DANWRDES  | XXXVTFAR  | DSWTDQPD        | DQQDFEFV  |           |
| ENGIEVQD          |           | APDSWELD       | TDDDDSDX  | RRSPFGRS  | DLDDIVGE        | FPDGPDSP  |           |
|                   |           | EDFQMEPE       | PNPDDSDW  | FSRPNQNP  | DEWDANVE        | AHTPWDAP  |           |
|                   |           | AFDDDTLD       | AGPDEL DW | NRSPQVSA  | XDADGFFE        | EIDEENTW  |           |
|                   |           | VMAEDWSE       | INLDEMES  | IANVPTAA  | XTMDWSVD        | DNDEDSQX  |           |
|                   |           | DFDIDPTD       | EATLEWDS  |           | EEESFNNE        | DADDDXXR  |           |
|                   |           | NMEPEWAE       | RAGVDVDS  |           | DDANA IWE       | QLEDDSWR  |           |

<sup>a</sup>M, Nle; X, amino acids whose identity could not be unambiguously determined.

Table S3. HePTP Substrates Selected From Library IV (AApYXXXXX)<sup>a</sup>

|       |        |        |       |       |
|-------|--------|--------|-------|-------|
| DEDQA | DDWVI  | DWFE G | WDDTE | QWDSV |
| EDWEN | DDWVM  | DWLDQ  | VDDME | VSEVQ |
| DDWV  | DDVWW  | DQWWD  | WEDVW | VADQA |
| EDWIE | EDRRW  | DGWID  | WEDIQ | RHHW  |
| DDTPD | DDRRN  | ERRWE  | WDWDV | QAPWE |
| DDAQD | DWDQA  | DQISD  | FDTWD | SQIRE |
| EDFSW | EW EQA | DITPE  | WESQV | WTSQN |
| DEWLF | EPEQV  | DWTSV  | WADDF | QWIFR |
| DEWQA | DWWED  | DRQIA  | QAEWD | NQQQV |
| DDWLS | DWVED  | QDDDW  | NWDWQ | SVTAP |

<sup>a</sup>M, Nle

Table S4. PTP-PEST Substrates Selected From Libraries I and III (ASXXXXXpY)<sup>a</sup>

|       |       |       |       |       |       |
|-------|-------|-------|-------|-------|-------|
| WEEDE | DWYQD | VVDDW | WEYDQ | FEDNW | GWDNM |
| MWDEE | DWWGD | FFEEL | WDYDS | WDDNI | LFDAP |
| WDYED | EKFID | SWDEI | WDYDA | WEDSM | LNDGG |
| EWWD  | ETHNE | SFDDL | EMWDW | WDDNP | EDWNY |
| PWFDE | TWGF  | WSEDI | DWSEF | WDENV | DEFAW |
| WGMDE | EDDDW | FTDDI | EAWDT | WEDVM | DDNWT |
| DWDL  | XEDDF | FNEEP | ELNEM | DYDWW | DDLFS |
| DWDL  | WDDEV | VSDDS | NWFDI | DYDWW | EDMWT |
| WFEYD | TDEEA | VSDDS | VFNDP | DMDWW | EDWNI |
| WFDID | EVDDW | MPEES | VFNDP | DWDWI | WDTNL |
| WDYFD | EWDDA | EEYDW | SWPDV | DWDSM | DLFSI |
| WENYE | GYDEW | EEWDW | FPGEI | EWDSA | DMWGI |
| WEIGD | WQDDF | DDNEF | QVSDV | DWDSM | EWQSI |
| WDGGD | FQDEF | EEMDF | EEDTV | SWDFS | WSTNS |
| ENWWD | WSEEW | QDWDY | NDDWW | NIDYS | TTNSS |
| DFNE  | WIDDF | GEWDF | MDDYW | GWDNM | MVRSS |

<sup>a</sup>M, Nle; Y, F<sub>2</sub>Y

Table S5. PTP-PEST Substrates Selected From Library V (AXXXXXpYXXXXX)<sup>a</sup>

|               |              |              |              |
|---------------|--------------|--------------|--------------|
| DDWWQpYDALDF  | PLDLpYEFFWD  | DSDDFpYAPDFW | QWDWFpYVDEPI |
| DAIDTpYDWQAP  | WWDAPpYDNEMN | DVDMWpYSEVEP | PWEPVpYWDTEF |
| ELWWpYDIQPP   | PFDIWpYENWDD | DSWSDpYNIDDF | NFDSepYSEFFN |
| EWQLQpYEEELVE | GHKFepYDDWWD | EFSFpYNDNDW  | WIPDpYIDNDM  |
| DLWWSpYEEVGV  | NFITDpYEFWDI | ADDEDpYGWAGI | SWQDpYWEXXX  |
| EQRTWpYDDWGP  | TTQLIpYEEDWF | IEMDDpYMNFPW | WPWENpYGGDFM |
| PEDWLpYHIWPL  | RAISFpYDDTWF | WEPDIpYGWTFE | MWQDIpYGWPF  |
| WDVDFpYEDMGQ  | SQATFpYDDLWN | WDPEMpYSVFFE | INWSEpYLDLWE |
| RMDDMpYDMWPQ  | SNLTGpYEDFFV | GWDEVpYTDWDP | NNQLWpYWEDDK |
| AFFepYEEPWM   | EEDWIpYGWFEF | XADVpYWEAEG  |              |

<sup>a</sup>M, Nle

Table S6. PTPH1 Substrates Selected From Library II (AXXXXXXXXXpY)<sup>a</sup>

| Intensely Colored                           |                                             |                                     | Lightly Colored                     |                                     |                                     |
|---------------------------------------------|---------------------------------------------|-------------------------------------|-------------------------------------|-------------------------------------|-------------------------------------|
| XXXK <b>N</b> KRR                           | XXXXX <b>R</b> QH                           | XXXXXS <b>K</b> L                   | HR <b>I</b> SRR <b>D</b> K          | XX <b>K</b> H <b>R</b> TSH          | XXXXX <b>L</b> K <b>Q</b>           |
| XR <b>V</b> PM <b>R</b> RR                  | RGRHH <b>N</b> V <b>R</b>                   | XSR <b>K</b> RRAT                   | FRR <b>R</b> I <b>K</b> ER          | RR <b>W</b> TP <b>Q</b> TR          | XHS <b>R</b> RR <b>G</b> V          |
| R <b>Q</b> R <b>T</b> H <b>T</b> RR         | PFR <b>K</b> R <b>A</b> FR                  | XRR <b>A</b> K <b>R</b> QP          | XX <b>K</b> R <b>H</b> DRM          | XX <b>L</b> Q <b>R</b> K <b>R</b> F | XXX <b>R</b> H <b>R</b> VM          |
| XX <b>K</b> E <b>R</b> TRR                  | XXX <b>W</b> SV <b>Q</b> R                  | KRG <b>P</b> RR <b>W</b> T          | E <b>R</b> R <b>V</b> HR <b>P</b> R | XXXX <b>H</b> K <b>R</b> F          | XXX <b>Q</b> R <b>K</b> F <b>S</b>  |
| LR <b>Q</b> RP <b>P</b> RR                  | XXXX <b>N</b> SV <b>K</b>                   | R <b>Q</b> PP <b>R</b> K <b>Q</b> T | XXX <b>I</b> H <b>R</b> HR          | R <b>N</b> SG <b>M</b> RR <b>A</b>  | X <b>K</b> RR <b>T</b> H <b>T</b> I |
| XRR <b>N</b> V <b>A</b> HR                  | K <b>M</b> RRR <b>R</b> I                   | IRR <b>Q</b> AR <b>Q</b> I          | SPR <b>Q</b> VR <b>H</b> R          | XXXX <b>W</b> RR <b>N</b>           | XXXX <b>N</b> R <b>P</b> T          |
| K <b>R</b> I <b>H</b> H <b>R</b> VR         | GRR <b>P</b> R <b>G</b> RW                  | RSRR <b>R</b> T <b>P</b> P          | RR <b>V</b> VP <b>N</b> HR          | XXXX <b>T</b> R <b>K</b> N          | R <b>A</b> N <b>F</b> R <b>X</b> X  |
| PPM <b>H</b> K <b>R</b> QR                  | SKR <b>G</b> R <b>F</b> R <b>N</b>          | XRR <b>V</b> R <b>G</b> Q <b>F</b>  | XXX <b>W</b> Q <b>M</b> HR          | XXXX <b>V</b> K <b>R</b> T          | XXXX <b>K</b> Q <b>N</b> V          |
| R <b>P</b> H <b>T</b> R <b>R</b> LR         | XX <b>K</b> G <b>R</b> N <b>R</b> F         | IGR <b>N</b> R <b>Q</b> X <b>X</b>  | XX <b>R</b> N <b>R</b> K <b>F</b> H | R <b>H</b> N <b>R</b> RA <b>K</b> N | V <b>G</b> R <b>R</b> S <b>X</b> X  |
| R <b>T</b> Q <b>F</b> R <b>R</b> Q <b>K</b> | K <b>R</b> T <b>L</b> Q <b>W</b> H <b>L</b> | RRR <b>K</b> NN <b>A</b> F          | XXXX <b>K</b> R <b>T</b> R          | SH <b>R</b> LR <b>L</b> RS          | RR <b>Q</b> R <b>X</b> X <b>X</b>   |
| XXX <b>W</b> R <b>K</b> FR                  | XXXX <b>F</b> W <b>H</b> Q                  |                                     | XXX <b>I</b> K <b>R</b> GH          | XAR <b>L</b> NG <b>R</b> F          |                                     |

<sup>a</sup>M, Nle

Table S7. PTPH1 Substrates Selected From Library III (ASXXXXXpY)<sup>a</sup>

| Intensely Colored       |                         | Lightly Colored         |                         |                         |                         |
|-------------------------|-------------------------|-------------------------|-------------------------|-------------------------|-------------------------|
| AY <b>E</b> ED          | E <b>F</b> E <b>Y</b> W | Y <b>W</b> E <b>D</b> E | E <b>Y</b> Q <b>Y</b> D | W <b>V</b> D <b>E</b> W | Y <b>F</b> G <b>E</b> G |
| WW <b>P</b> D <b>E</b>  | D <b>Y</b> E <b>Q</b> W | F <b>D</b> Y <b>D</b> E | D <b>Y</b> I <b>Y</b> E | W <b>Y</b> E <b>E</b> N | AY <b>V</b> D <b>N</b>  |
| W <b>E</b> D <b>Y</b> D | E <b>W</b> E <b>Y</b> Q | D <b>Y</b> F <b>E</b> D | D <b>W</b> V <b>W</b> E | P <b>Y</b> E <b>D</b> V | AY <b>A</b> D <b>V</b>  |
| D <b>W</b> D <b>Y</b> E | E <b>W</b> E <b>Y</b> T | E <b>Y</b> Y <b>E</b> E | D <b>Y</b> Y <b>A</b> D | Y <b>D</b> Y <b>E</b> F | Y <b>Q</b> S <b>D</b> M |
| D <b>E</b> W <b>F</b> D | E <b>W</b> E <b>W</b> G | AW <b>Y</b> D <b>D</b>  | G <b>S</b> Y <b>F</b> D | F <b>D</b> F <b>D</b> W | W <b>E</b> E <b>Y</b> F |
| D <b>F</b> F <b>F</b> D | A <b>Y</b> E <b>Q</b> W | Y <b>I</b> Y <b>D</b> D | G <b>A</b> Y <b>F</b> D | I <b>D</b> Y <b>D</b> W | F <b>D</b> E <b>Y</b> F |
| E <b>F</b> A <b>Y</b> E | V <b>W</b> D <b>S</b> F | MP <b>Y</b> E <b>D</b>  | A <b>A</b> Y <b>D</b>   | G <b>D</b> W <b>D</b> W | F <b>D</b> E <b>T</b> W |
| D <b>W</b> W <b>A</b> E | N <b>D</b> Y <b>S</b> W | Y <b>Y</b> A <b>E</b> D | Y <b>S</b> S <b>Y</b> E | Y <b>E</b> N <b>D</b> F | Y <b>E</b> E <b>G</b> W |
| H <b>A</b> Y <b>T</b> E |                         | V <b>Y</b> I <b>D</b> E | W <b>S</b> N <b>Y</b> E | Y <b>D</b> S <b>D</b> W | Y <b>D</b> E <b>L</b> F |
| T <b>Y</b> G <b>G</b> D |                         | D <b>W</b> E <b>I</b> D | Y <b>S</b> Y <b>S</b> D | W <b>D</b> P <b>E</b> W | W <b>D</b> E <b>A</b> M |
| E <b>Y</b> D <b>D</b> F |                         | A <b>Y</b> E <b>W</b> D | W <b>N</b> Y <b>S</b> E | Y <b>E</b> Y <b>E</b> P | E <b>F</b> E <b>Y</b> W |
| S <b>W</b> D <b>E</b> W |                         | Y <b>S</b> D <b>Y</b> E | W <b>A</b> Y <b>N</b> E | M <b>E</b> W <b>D</b> I | D <b>P</b> D <b>Y</b> W |
| V <b>W</b> D <b>E</b> F |                         | Y <b>I</b> D <b>Y</b> E | S <b>Q</b> Y <b>I</b> D | E <b>A</b> Y <b>E</b> F | D <b>W</b> D <b>Y</b> V |
| D <b>D</b> Y <b>D</b> W |                         | Y <b>V</b> E <b>Y</b> E | V <b>Y</b> T <b>Q</b> D | D <b>W</b> Q <b>D</b> F | F <b>G</b> D <b>P</b> W |
| W <b>D</b> T <b>D</b> W |                         | V <b>Y</b> D <b>N</b> D | A <b>Y</b> S <b>I</b> D | D <b>W</b> I <b>D</b> F | V <b>Y</b> D <b>Y</b> S |
| Y <b>E</b> V <b>E</b> W |                         | E <b>E</b> W <b>Y</b> D | A <b>Y</b> G <b>A</b> E | D <b>Y</b> V <b>D</b> F | Y <b>I</b> E <b>Y</b> S |
| W <b>D</b> F <b>D</b> I |                         | Y <b>D</b> F <b>W</b> D | A <b>D</b> D <b>D</b> W | D <b>F</b> W <b>E</b> N | D <b>E</b> Y <b>F</b> F |
| F <b>D</b> Y <b>D</b> I |                         | N <b>D</b> Y <b>Y</b> E | F <b>Y</b> E <b>E</b> F | E <b>Y</b> W <b>E</b> V | E <b>D</b> S <b>Y</b> W |
| D <b>W</b> Y <b>D</b> N |                         | G <b>D</b> W <b>Y</b> D | F <b>Y</b> D <b>E</b> F | E <b>Y</b> W <b>E</b> I | Y <b>E</b> N <b>T</b> W |
| E <b>Y</b> W <b>E</b> G |                         | F <b>E</b> A <b>Y</b> D | F <b>F</b> E <b>D</b> F | E <b>A</b> Y <b>E</b> I | I <b>D</b> G <b>Y</b> I |
| H <b>P</b> Y <b>D</b> F |                         | F <b>D</b> W <b>N</b> D | T <b>W</b> D <b>E</b> F | D <b>Y</b> G <b>E</b> I | D <b>S</b> N <b>Y</b> W |
| S <b>A</b> Y <b>E</b> M |                         | Y <b>D</b> W <b>I</b> D | Q <b>Y</b> D <b>E</b> F | H <b>P</b> Y <b>D</b> F | D <b>W</b> Q <b>Y</b> S |
| H <b>P</b> Y <b>D</b> G |                         | Y <b>E</b> I <b>S</b> D | T <b>W</b> E <b>E</b> W | A <b>Y</b> A <b>D</b> F | E <b>Y</b> W <b>S</b> Q |
| Y <b>D</b> D <b>S</b> W |                         | D <b>S</b> Y <b>Y</b> E | V <b>Y</b> D <b>D</b> W | W <b>N</b> Y <b>E</b> L | D <b>Y</b> W <b>N</b> Q |
| Y <b>E</b> D <b>N</b> W |                         | D <b>S</b> W <b>F</b> D | I <b>W</b> E <b>E</b> W | A <b>A</b> Y <b>D</b> S | D <b>A</b> Y <b>T</b> N |
| Y <b>E</b> D <b>I</b> T |                         | D <b>A</b> Y <b>W</b> E | Y <b>H</b> E <b>D</b> W | S <b>A</b> Y <b>E</b> I | T <b>Y</b> I <b>F</b> H |

<sup>a</sup>M, Nle; Y, F<sub>2</sub>Y

Table S8. TCPTP Substrates Selected From Library I (ASXXXXXpY)<sup>a</sup>

|        |       |       |       |       |       |
|--------|-------|-------|-------|-------|-------|
| CHKWR  | HRSRY | RRRIT | PRRMI | RIRTI | WRPGT |
| WSKAR  | HRFKN | KRRSL | PKHLM | GFRXX | RSGAF |
| HRRKT  | RRIHS | TRRQW | KSRGF | RRIE  | TAWQD |
| GHRRRI | VNRNF | QRREI | RARFT | RRWDI | QSSRW |
| RFRRQ  | XKPKF | GRKEI | RGKEI | KKFFA | XXXGW |
| SPRKW  | VRSRG | VRRFI | KFRTV | RKNFT | NYTWS |
| SFKRI  | RFAKT | PKRWI | RFHXX | RRVFN | TAWST |
| GFERRA | RFAKT | FRRPT | RNRIT | RRIGQ | XXWGT |
| GFERRA | KKRYN | WKKQL | RSRAN | RRNAP | GFXXX |
| GFKRI  | KHRFT | FRRIA | RGRNI | RRXXX |       |
| XXHKI  | HRRFI | PKRAS | RGRNI | FRSWN |       |

<sup>a</sup>M, Nle; Y, F<sub>2</sub>Y

Table S9. TCPTP Substrates Selected From Library III (ASXXXXXpY)<sup>a</sup>

|       |       |       |       |       |       |
|-------|-------|-------|-------|-------|-------|
| WEDEE | ITDQD | FSEDW | YDYDH | VWDWP | RNFFT |
| DWEED | ITESD | VTDDF | DQYDW | WWDTR | QGWTA |
| DWYDE | DEGTD | YYEEN | DAFDW | AIDTA | WGTSG |
| QYWDD | YDYFE | YWEEN | EIWDW | EEWSW | FMRPI |
| WGWDD | YEWYE | SWDDA | EWIDY | GEYSW | WGRVH |
| YWIIE | VDYWD | FDYDY | DWMDW | WDGNF | AITGN |
| YDEWD | YDSWD | WEYEF | EWWEI | FDYYS | STHTI |
| WFDYE | WDFIE | IDFEW | DIWEI | EYSWS | ATMRI |
| FYDWE | DWNFE | FDTDW | ITNDI | EWGYT | RIVRG |
| IYDYE | ETAWD | WDAEF | IISDA | DWFTG |       |
| WNDYD | GFISD | WDWDN | DVDWY | DYFPM |       |
| YMDWD | SFGGD | WDWDN | DWDWQ | EFFRP |       |
| YYEID | FIITD | WDWDN | DYDFI | DPFTG |       |
| YYEID | AVTGD | WDWDN | DWDRI | EFNTA |       |
| YYEID | YFDEW | FDWES | DTEFG | IQRNF |       |

<sup>a</sup>M, Nle; Y, F<sub>2</sub>Y

Table S10. TCPTP Substrates Selected From Library IV (AApYXXXXX)<sup>a</sup>

| Class I |       | Class II |       |       |       |
|---------|-------|----------|-------|-------|-------|
| EVDEX   | WDGXX | HRKRR    | KRAQR | RVRNR | PTKIR |
| DWDWI   | IDWNF | RRKGK    | RRPAR | KLRXX | SIRXX |
| EWWEK   | VDVWF | HRKVR    | RRINV | KIRXX | SARXX |
| DWFDR   | WWDRI | KKRFW    | KRXXX | RIHXX | XXXRW |
| DWXVE   | WWDQA | RRKGF    | RHIXX | RLRXX | VMSXX |
| DWVFS   | WWDXX | RRRPG    | RFKRR | KIIRR | GIIXX |
| DWEXX   | FIDXX | RRTRK    | RQKKK | KAIRR |       |
| WDEWI   | NWEIW | HRNKR    | RFKKA | KGARR |       |
| WEIWD   | FWWDK | KRARR    | RIRKF | IRRKK |       |
| WLVVT   | YPYEI | HKIRR    | RLRRI | MHKRR |       |
| YEYXX   | WTSYD | KRFAR    | RMRKI | SRKWR |       |
| WDYLV   | TYWQD | RKVFR    | RIKRV | NRRXX |       |
| FEVWN   | SFGSD | RRSGR    | RVKTR | VRRXX |       |

<sup>a</sup>M, Nle; Y, F<sub>2</sub>Y

Table S11. PTPD2 Substrates Selected From Library III (ASXXXXXpY)<sup>a</sup>

|       |       |       |       |       |       |
|-------|-------|-------|-------|-------|-------|
| WEWDD | WQEDI | DWYDV | YYDFN | SDFQF | DYHIT |
| WFADD | WHEDL | DYYDI | FFDYT | WDSGN | EIITG |
| XIYDE | HYDDI | EHYEI | WSENV | XDAYS | EGYTI |
| SWDFD | IGEEI | QTWDS | IYDYN | PDNTM | DYYGI |
| FWDQE | DEWES | SYPII | YNDYI | VDYNI | ISNGW |
| EEHYE | LEYDF | XXLOM | GSELA | VDYLI | WATFR |
| EFWAD | SDFEI | SEEWY | DENFW | EAWTA | SNYQI |
| FTFGD | YBYES | WEHAI | DEWYF | ETWMI | XTGNA |
| WWISE | XELDT | XEDSI | EEWWG | EWYTT |       |
| TSQGD | YFYDI | XFDIS | DEWTM | DFIGS |       |
| AWEEA | ETWLI | VTDTW | DDFYI | EFTSL |       |
| XWEEI | DWYDV | FVDFS | DEYTI | DFHTA |       |

<sup>a</sup>M, Nle; Y, F<sub>2</sub>Y

Table S12. PTPD2 Substrates Selected From Library IV (AApYXXXXX)<sup>a</sup>

| Class I |       |       | Class II |       |       |
|---------|-------|-------|----------|-------|-------|
| EDEWF   | WDEEI | YLEDY | RHKRF    | RTHRR | GHMRR |
| DDWEY   | VEYFY | YGDYI | RRRRS    | KIHRR | SRVXX |
| DDQWW   | ADYFY | YADWE | RKRSH    | RVRRN | LRQXX |
| EFDWW   | YDVFE | YTEFF | KRKMR    | RQFKR | SAKRR |
| DSEYF   | SDWFD | AWEHN | RRRPR    | RNSHR |       |
| EWNDY   | IDWWD | TVDYI | RRKIF    | RMIRR |       |
| EYHXX   | YDFFR | WQFDD | RRRXX    | RIXXX |       |
| EVVRY   | YDYFA | YSWEE | RRRXX    | QRRHR |       |
| WDEEI   | YDYTT | WSSEY | RKFKH    | SRHRK |       |
| WEEYE   | YEWSM | WVNEY | RRVKR    | GKRKR |       |
| FDDYF   | YEFIH | WITDH | RRFRT    | XRKRW |       |
| FDDNW   | YDNFS | TGYEW | RRMRS    | MRRKN |       |
| WEWDE   | TEWYY | MRNEK | RRASR    | IRRRR |       |
| YDFEY   | WYDEE | YSHWD | RRINR    | IRRSR |       |
| WDMEF   | YYEEF | AWQFD | RRTXX    | LRRAR |       |
| YDVDF   | WWDEQ | GRXXD | RRNXX    | MRRFV |       |
| WDTDS   | YWEEQ | IWNHW | RRXXX    | IRNRR |       |

<sup>a</sup>M, Nle; Y, F<sub>2</sub>Y

Table S13. PTPRB Substrates Selected From Library III (ASXXXXXpY)<sup>a</sup>

|       |        |       |       |       |       |
|-------|--------|-------|-------|-------|-------|
| FWEED | DWFFD  | WDEEA | EFDLF | NHORI | DPWXX |
| FYFED | DWPWD  | SDWEM | DWELF | DDYWT | FGWGW |
| WLYED | HSLFD  | DWVEW | EWENW | DWSSW | RYLFX |
| FIWDE | WXXPD  | DWYDI | DWDWG | WDNVF | INYVS |
| WWQDD | TSGTD  | LGYDW | GYDFY | WDNVF | SNFSA |
| YWIED | YYDEF  | TSWDA | YWDTT | LEFWP | MPWNI |
| WIHDD | WQEEW  | FGIDV | YWDTM | PDFTG | ITFXF |
| WEWWD | WIDDF  | SSIES | WFDXX | WDIXX | FRSNV |
| WYDYD | YWEEES | YDDFW | FYDPI | WDLXX | WNTXX |
| WWDYD | FWDEM  | FEDTW | SWDIS | NEVTA | VNTNS |
| FFDFD | WSDDS  | WEDSW | GFDTA | SDSVG | NIIST |
| GMEWD | ITDDI  | FDDNF | GWXXX | QDXXI | HPITS |
| WMEID | ITDDI  | FDDIW | FIDGM | DYYPF | ISNIS |
| WDGFD | NEYDW  | IEDXX | ITDNA | EMWYP | SHQVX |
| WEWID | IDWEW  | DWDFY | ASEAV | DWWPQ |       |

<sup>a</sup>M, Nle; Y, F<sub>2</sub>Y

Table S14. PTPRB Substrates Selected From Library V (AXXXXXpYXXXXX)<sup>a</sup>

|               |               |              |              |
|---------------|---------------|--------------|--------------|
| XXKWMpYKRNVK  | AMAPIpYGRFKQ  | RRNFTpYRGGIM | QSNRFpYAKRRI |
| VPNAMpYRMKKR  | ATNNLpYGRMIR  | KPNITpYARRGR | NPFAIpYMKRPR |
| QLTEMpYRGKRM  | MHKDpYAGKRF   | RFFPNpYARLKR | XXXXXpYGKRFK |
| GTQGMpYRQRWD  | ASPNMpYSNKPK  | RREGNpYXXKWQ | XXXXXpYGRKWP |
| QRPTMpYRTRXX  | IKRRVpYGMRGK  | RGKSTpYVFNQR | XXXXXpYXKKGM |
| KGNKApYRGARF  | IPPGMpYGFRRGQ | MRXXXpYRHRRI | RKMRPpYIRKQG |
| FSAVpYRXXXX   | ASSHVpYNAVRR  | LXXXXpYRVHRS | NSXXXpYAQPRR |
| MPDNIPpYTRIRR | RPFSIpYGXXXX  | RFATDpYRQRPK | RRQPXpYXXXXX |
| XXXQVpYMRPRT  | KLRGSpYRQTHF  | XXXXXpYRIKLK |              |

<sup>a</sup>M, Nle

Table S15. PTPRC Substrates Selected From Library II (AXXXXXXXXXpY)<sup>a</sup>

| Intensely Colored |          | Lightly Colored |          |          |           |
|-------------------|----------|-----------------|----------|----------|-----------|
| IEIDWDEE          | WWDNGIDF | DDIVWDED        | QFWEWGGD | DEIEVNDW | XIEDEIWG  |
| WSWAMDDE          | SWDNVWEG | EHPFWDDD        | FEDFASFE | ADAEFWDS | DEPDEGWV  |
| IPWDDWEE          | DHGNQSDM | ELFFSDEE        | DMDIWQPE | DLQDWFDF | SETDEQIW  |
| FWLNDWDE          | AIQWGNW  | ITMAWDDE        | TNEIWQWD | XTSDIWDF | IESEDWQL  |
| WVEDGWDD          | NGTSWWDQ | WIDVERDE        | QSDPISWE | VSSEWWDN | EWVEDTFV  |
| TWWDLWDE          | XNNWAWDA | EDMWDMEE        | XWDWIVND | VWNEPWDA | DVGDDVWP  |
| WLLWLQDD          | TNEEDEFW | TTIWDWEE        | LDQSVWVE | NEDPWNEV | NVQDEWPW  |
| MDNIFWED          | WGIDDDFN | EDWEPIED        | WDSTTWVE | ISEFANEW | HWADDNQF  |
| AEQMWWED          | DWFMDDSW | NNWDSFEE        | DWPTMAWD | TWDQTIW  | PTADDWSN  |
| EWWINSD           | DSWDDAI  | XPDNWFDD        | DAFSWSPD | GWVVMWDA | DIIDWXXX  |
| NSQWWPEE          | VEWDWDWS | AMEPWLDE        | IVNEDEDL | DETWGWDI | NVEWDFGQ  |
| QVWTDWWD          | AIDPWDPW | AENWMWEE        | IFTIDDEF | XDPWTSW  | TVBMDWNG  |
| TQWDSWE           | WNDLLESW | IKSSAWDE        | WTTNDEEF | GDPLNDW  | EDNWDGFM  |
| WEAGPDAD          | DMWSQDW  | FTFPWNED        | XWWWDEEG | NDFAWFDP | NDQLDWLL  |
| TDNWLWND          | EWEEQWA  | SPWWTVED        | WVEDVEEA | WDNINWET | FEWAHPIT  |
| WDEDLVWD          | DEWEDWII | ISDWDEID        | FDIDSEDF | EVMNWWLV | PEWDMMA   |
| VFNLDWTD          | IDFDDWWW | WVWDFDME        | PNIDGEDW | XDDMDEWA | DEDDFNSW  |
| MDDTWWD           | GDGDEWWT | SVPESDVD        | VWWEDEG  | DNENDDSW | DEEDFFWT  |
| ESEWWRSE          | DTWDDLWA | SDFVMDQE        | VEEWFDEI | VEFRDEIF | DSEDQWNN  |
| DDMWSNWD          | WNNEDWTW | DWSWSDNE        | SEPWPDEW | EFITDDTW | DIDEWLMQ  |
| XDWDDDEE          | DDDLDWQ  | LWWTDFD         | SDGWNDES | SWGMDMW  | SMDDWLGI  |
| LWSTEDEW          | DVDWDTMF | GFSSWSD         | WDSQNEEV | XFDEGEWS | XETESFGW  |
| WDFDVEDV          | XEPWEQWW | GWTWLDQD        | WGWTTEV  | VWEDSEVL | FDNDWNWQ  |
| DWWDSEDM          | SEWNDWNN | ITWRSQD         | XWSITDEA | WIWDSERW | XEWDFWLN  |
| EDWAAEDS          | XEEWWWG  | IDDDDPWD        | AFTDDWDQ | IQQEFDWA | WDWDP SIL |
| DAQIWDW           | DMDDNWTI | QEHDDWWE        | XWQEDWDS | WGLDTEFN | ETNDNAWW  |
| WQPWTEDT          | SMDDNWWQ | MWEAESGE        | WDVQDPDW | WINEWDQN | ELWEAATW  |
| DFEPENEW          | WNDDWLLQ | GWPAEWAE        | TESWEWDT | IEEWKESV | XVADWFWW  |
| EQMWDWDT          | XDDWNWTN | SVVSEWND        | DWNIDNEF | WEETLEPT | LWLDNSPR  |
| XNFVDWDW          | ESDVLWQW | GDDESWE         | GVGIEWDW | DFEWFNDQ | TDEWLNQF  |
| MVWPEWDV          | WNDNPSIW | FSEESQWE        | XFITDAEW | EIENWEAM | MDDFQWTP  |
| XXXDWPDW          | DDWMVWPN | EFNEWITD        | PGSNDWDN | NTEWWDTV | DQEMWNSM  |
| WWADSMQ           |          | XINDFVWD        | WVGFDVES | DNWQGDW  | XNDWVSNW  |
| WDDSFSDV          |          | WVIDSPWE        | MEDELMDL | EWGANDLW |           |

<sup>a</sup>M, Nle

Table S16. PTPRD Substrates Selected From Library II (AXXXXXXXXXpY)<sup>a</sup>

| Class I           |          |                 |          | Class II |           |
|-------------------|----------|-----------------|----------|----------|-----------|
| Intensely Colored |          | Lightly Colored |          |          |           |
| XCWIDWEN          | AWFDETQW | VWELMWEF        | AIEKWWDM | XKRWWKNN | ARNRKRGN  |
| NDFFLGDW          | WLDPLATW | EWQWMEID        | AWTEMDRW | PKSRFRQQ | SKKFRQNI  |
| DEFVTWVDF         | SGTDSWSW | WDWGAAFD        | MTFWSDSI | IKRWPTRL | QVGRFRXXX |
| DSWWXXDW          |          | AFMRKKMD        | PADWDPMM | FRSHQQRR | AARKKRLI  |
| TWLETDLF          |          | XXIDFKDI        | PDDFNWNE | RRLRSEVN |           |

<sup>a</sup>M, Nle

Table S17. PTPRO Substrates Selected From Library III (ASXXXXXpY)<sup>a</sup>

|       |       |       |       |       |       |
|-------|-------|-------|-------|-------|-------|
| FFEWD | LWEDF | ESWDM | EPDWI | DDFWI | EHVTA |
| WNDFD | VWDDF | QMWDF | ETEKV | EETWM | TFQTW |
| NIDFD | FMDEF | WSSDF | WNOMF | DDAXX | ITAVF |
| NQDVE | WYEDV | WATDW | ITDNF | WEPYF | GTGYL |
| EDWWD | YWDDI | AMGDF | GSEGF | NDSWY | GTGYI |
| EEWWD | TWDDL | NYWEP | TWEWT | NEWWT | XXIWP |
| FEWYD | QWDDI | IWYDI | TWEFS | WDWAV | NWFAI |
| FDLWE | WIEDT | PFFDI | FFONS | SDFHI | PWWXX |
| FDIWE | WEYEF | WAFES | FFEHT | WEHSP | HTWQI |
| FEWGD | VEWDW | FMWDV | YFEQV | SDINH | ISYGI |
| MEWTD | WDMDF | SGWDM | WFOXX | SEHTI | MWGTA |
| WDVLD | WEIDW | FETDT | PFDTI | EFWFF | SWTXX |
| DWWND | IDMDW | DDEFW | VWDTA | DPFYF | WNSNR |
| EWYSD | WEWLI | DDDFW | FIDTV | EWTNF | FGNTA |
| EWNSE | WEWLI | YDDFW | WIDSI | DFWWS | WNSXX |
| FNIWD | IEWDM | FDDYM | FNDXX | ESWWN | WSGXX |
| WYYND | ESWDW | FDDHS | FPEXX | DFIWS | TITTM |
| FVWPD | DVWEF | WDDTM | IGEAS | DFAWS | NPQTI |
| ATWGE | EIWDW | WDEXX | IGETG | DTIWN | GATTA |
| TWVND | EWPEW | EWFFF | MVETA | ETWGT | GITSM |
| IWXXD | DWHEF | EFDFW | DEFNF | DAWTA | HTTGG |
| WIHSD | EWVES | DEFWN | EEPFW | ETWGM | KNHAP |
| NVIGD | DWYES | EWYI  | DEWNF | DFASP | ASGGM |
| WEDEF | EWWEI | EWEFI | DDWMF | DFHXX | TKGAI |
| WEDEF | DWYDV | EWWDG | DEWWA | DIVNT |       |

<sup>a</sup>M, Nle; Y, F<sub>2</sub>Y



Table S18. PTPRO Substrates Selected From Library V (AXXXXXpYXXXXX)<sup>a</sup>

| Class I      |              | Class II     |               |
|--------------|--------------|--------------|---------------|
| FFEQApyFEDNH | NNQXXpYMFDEE | TQXXXpYDMSWE | RQFRKpYGGRKE  |
| GLNFGpYWDDFG | EWFDSpYAWDIS | XXXXTpyEFGQD | RPTNFpYRQPQR  |
| XXXXXpYWDSEE | XXXXXpYMWLDD | DFWWDpYEVWPS | DQWDEpYSPWFS  |
| PIXXDpYWDVDT | PFEDFpYMPWWG | EXXWDpYEPMWN | RGIQDpYQGFFR  |
| FENEApYWEVDF | FSQEIpyVSWAN | AWQDMpYDWQPF | XXXXXpYGIQTW  |
| IENDMpYFDSEL | AWGNFpYEEEWS | AISDTpyEAWWN | LTXXXpYGLKWTW |
| FQMFDPYFEPPE | TNXXXpYEDWEI | ASVDSpyDFASF | DSNSIpyQVRKR  |
| NEEVFpYWELVE | SEXXEpyDEIFD | TTSNWpYDMSPV | VNGXXpYKANKK  |
| XEAATpYWELFD | TNPAWpYEDWLE | XXWDMpYQEDGK | RQTXxpYGRPRS  |
| SDWGIpYWDQQE | XXXXXpYEDPND | IAFFEpyQDMEW | RGNALpYRSHKM  |
| GMXXDpYWENMW | DAWWDpYEDLFI | VAWDNpYSEWDV | RFKTSpyQSRQR  |
| ARNDFpYWDMSV | FWSNApYDDFWQ | XXXDKpySEMEW | RRSAVpYRGGHK  |
| VSWWWpYWENPI | SWSVPpyDDWPI | WGNXXpYNDWDV | XXXXXpYGKKRM  |
| FPFIPpYWNDED | AELFPpyEEWIW | VDFWGpYQWEDD | SIGXXpYRRFKQ  |
| SGPXXpYWWDEV | GEWMFpYEEGFQ | EWNTFpYSWDES | SNRRApYGRLMK  |
| TPSVQpYWSEEM | EPWTWpYEDWGM | QWSEDPYTFEWE | RRFASpYNSKRM  |
| TWDTNpYWVEVD | TWQAVpYDDAWF | XXXXXpYQPEQE | TRKGMpYGSRAK  |
| XXXRApYFMEFE | XXXXXpYDWEDE | PFTDwpyTFETT | XXXXXpYXKSAAK |
| APFFDpYWIEPP | WLNSPpYDWDEI | GRDMFpYTFFEE | GMXXXpYGRVRW  |
| LITDIpYWSDFS | SXXXPpYENEDT | NNRNIpYSYSED | XXTVPpYGRKIK  |
| EIDPWpYWSEGF | DADVWpYDFDLE | LWEDVpYSWGDH | LQRGpYKRGRR   |
| IQDPTpYFWEPT | DPIEIpYEIDWF | XDDWFpYSTLEN | VKSGQpYNFRRI  |
| TQFNDpYWFMEE | VXXXXpYDWIEE | SXXXXpYTPWEQ | KADGIpYTRRRF  |
| FPIEWpYWPGED | WNVFDpYEFAT  | XXXXXpYSWAEN | KHRGvpyAHRKF  |
| MEDLFpYFGSEW | PEFDWpYDNAEF | ISGEWpYNNWNE | DERQApYVRGRK  |
| IXXXXpYWGFEV | PADGFpYDSSDW | WGDDFpYSIPPW | ARNFRpYATGWG  |
| PSDWDpYFNFLD | EWAQApYDWFEN | TFDEMpyTTTPN | RKTGApYGFKSR  |
| QTEEFpYFWNPE | XXXXXpYDGSDF | QHDXxpYGDWKD | ATKQApYRITRR  |
| VEMDPpYFWQWD | DVWNWpYDRFDQ | NRMPQpYGEFMW | NXXXXpYGWKPR  |
| ESXXXpYWQPWD | XXXXXpYDSWEW | IFDvDpYGREFW | XXXXXpYRKAQR  |
| QGXXXpYWMPWE | IRXXXpYEVFDW | LSWQDpYGGWFD | XXXXXpYRRKKW  |
| FINEFpYMDLDW | NVFASpYDWPWD | FWDSTpYGPRVV | IRLRRpYQGKMK  |
| IDWVApYAEWMD | IEWIFpYDQWAD | WLDDEpYRVWDP | XXRMMpYRQAKR  |
| QDFESpYMDWSS | WEWSVpYDVNWD | IRNXXpYRDDDF | RVHAFpYGKKVW  |
| XXXXXpYADTTA | SWXXXpYDPMAD |              |               |

<sup>a</sup>M, Nle

Table S19. Kinetic Constants of PTPs toward pNPP Substrate

| PTP   | pNPP                      |                      |                                     |
|-------|---------------------------|----------------------|-------------------------------------|
|       | $k_{cat}$<br>( $s^{-1}$ ) | $K_M$<br>( $\mu M$ ) | $k_{cat}/K_M$<br>( $M^{-1}s^{-1}$ ) |
| PEST  | $6.7 \pm 0.2$             | $2800 \pm 300$       | 2400                                |
| PTP1B | $20 \pm 1$                | $2700 \pm 200$       | 7300                                |
| PTPRC | $77 \pm 4$                | $9900 \pm 900$       | 7800                                |
| PTPRO | $99 \pm 4$                | $2800 \pm 300$       | 35000                               |
| PTPRB | $56 \pm 1$                | $350 \pm 30$         | 160000                              |
| TCPTP | $6.1 \pm 0.1$             | $790 \pm 50$         | 7700                                |
| SHP-1 | $14 \pm 1$                | $6000 \pm 250$       | 2300                                |
| PTPH1 | $1.3 \pm 0.1$             | $1100 \pm 200$       | 1100                                |
| SHP-2 | $12 \pm 1$                | $9200 \pm 1500$      | 1300                                |
| PTPD2 | $0.036 \pm 0.001$         | $2100 \pm 100$       | 17                                  |
| PTPRA | $2.5 \pm 0.1$             | $4800 \pm 400$       | 530                                 |
| HePTP | $3.2 \pm 0.1$             | $9600 \pm 600$       | 340                                 |
| PTPRD | $0.29 \pm 0.01$           | $2400 \pm 300$       | 120                                 |
| PTPD1 | $0.014 \pm 0.001$         | $5500 \pm 200$       | 2.5                                 |

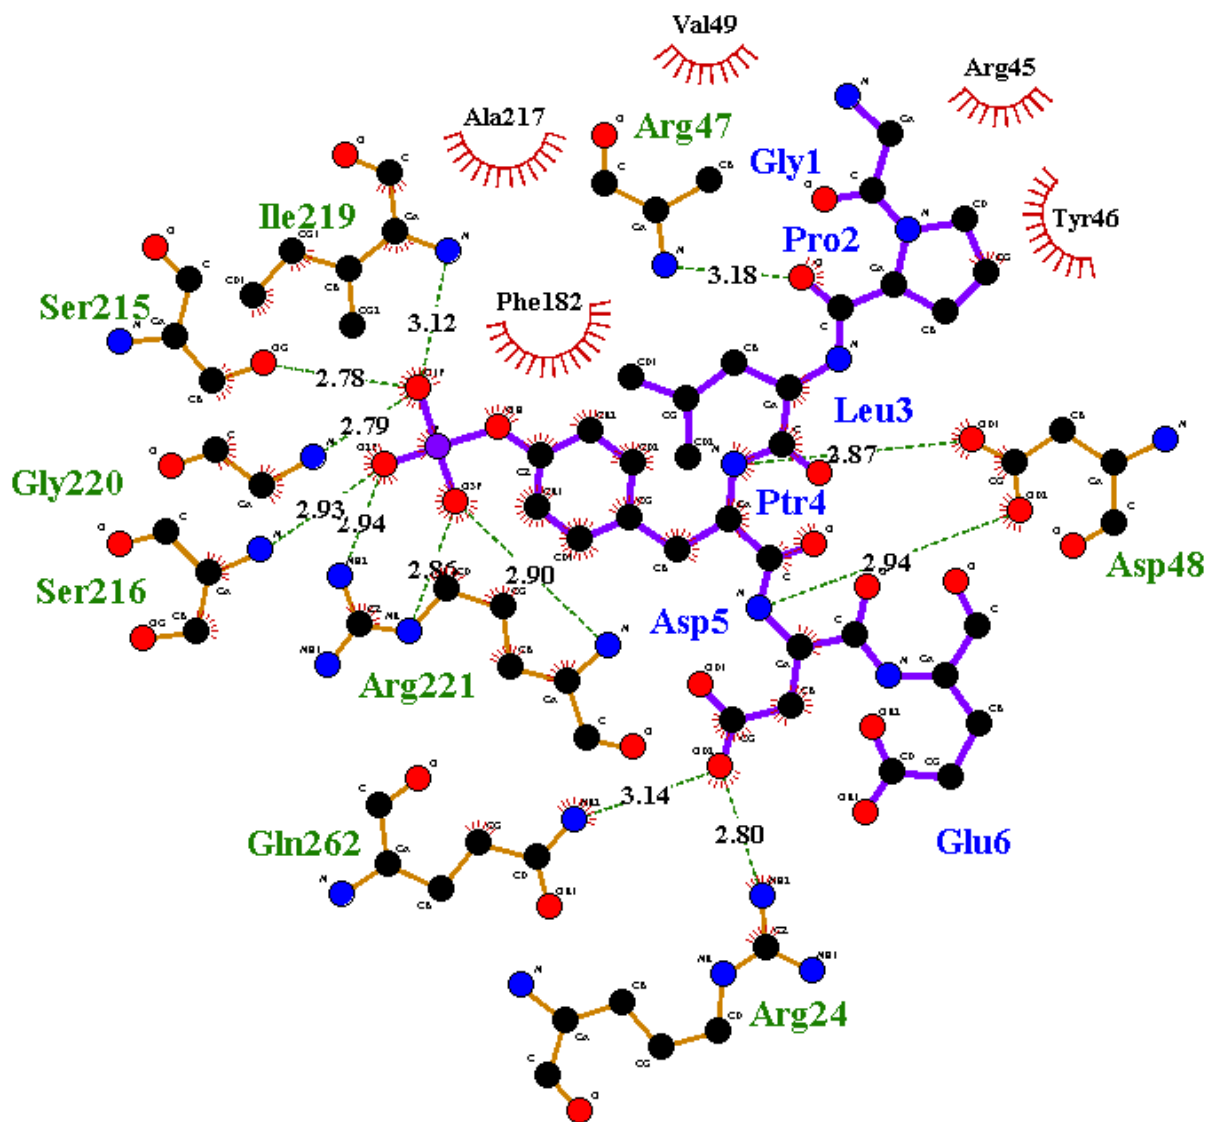

**Figure S1.** 2-D representation of the interactions between PTP1B and the Nephrin peptide AWGPLpY<sup>1193</sup>DEVQM. Direct hydrogen bonds and electrostatic interactions are shown as green dashed lines. The atoms are colored as: black, carbon; blue, nitrogen; red, oxygen; and purple, phosphorus. Distances shown are in angstroms. Graph generated by LIGPLOT.

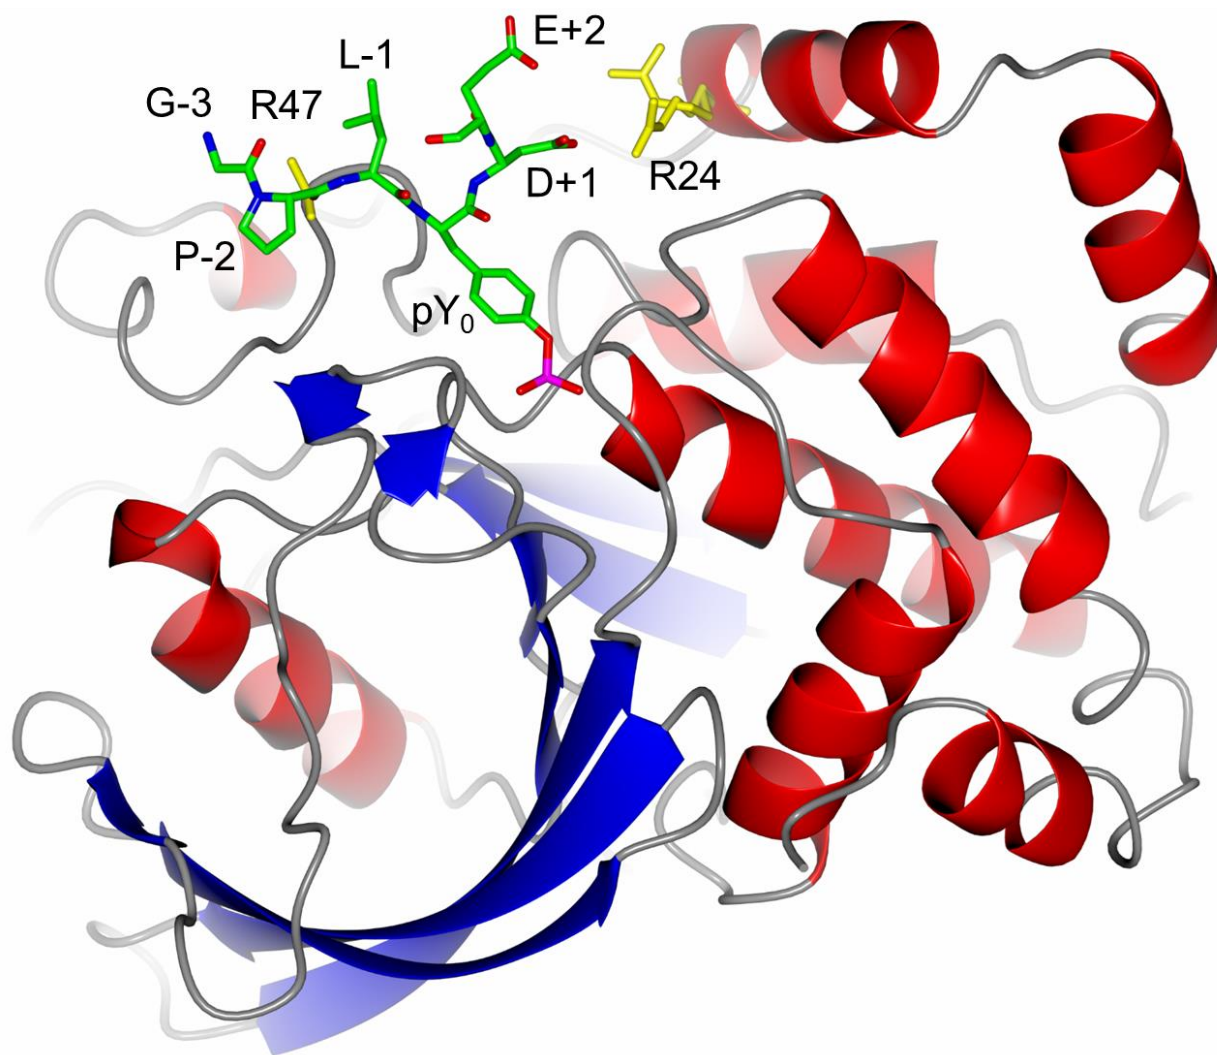

**Figure S2.** Co-crystal structure of PTP1B-nephrin pY<sup>1193</sup> peptide showing the two alternative conformations of Arg24 side chain. The side chains of Arg24 and Arg47 are shown as yellow sticks.

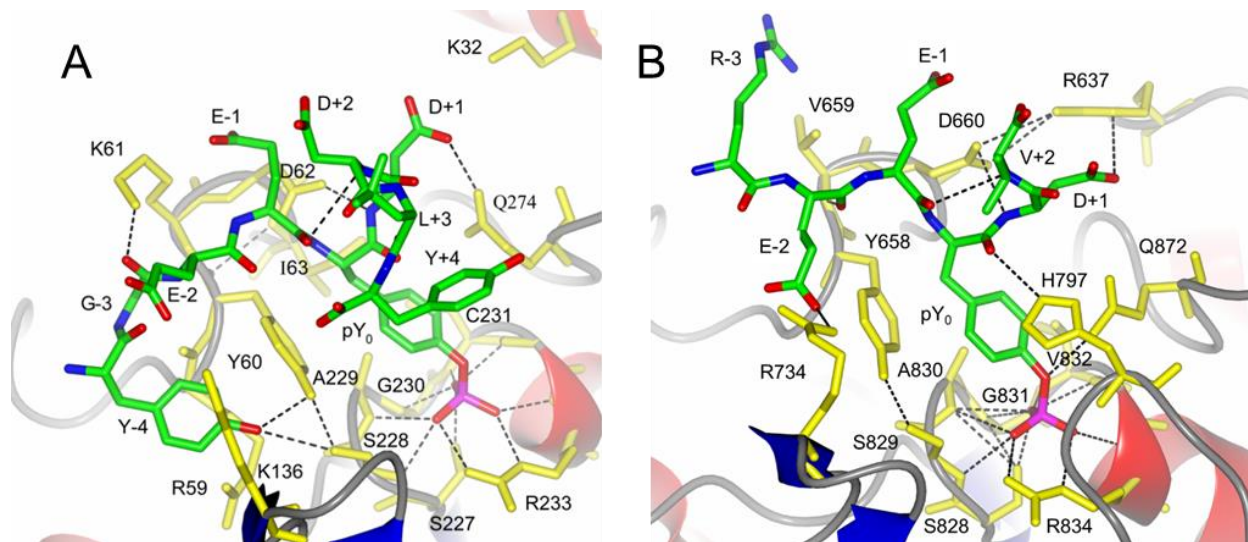

**Figure S3.** Co-crystal structures of PTP LYP (A) and CD45 (B) bound with pY peptides. For (A), the sequence of the pY peptide bound to LYP is YGEEpYDDLY (from pdb: 3OLR<sup>1</sup>). For (B), the sequence of the pY peptide resolved is REEpYDV (from pdb: 1YGR<sup>2</sup>). The peptide (green) and interacting residues (yellow) are depicted in stick representation. Hydrogen bond interactions are shown as black dashed lines.

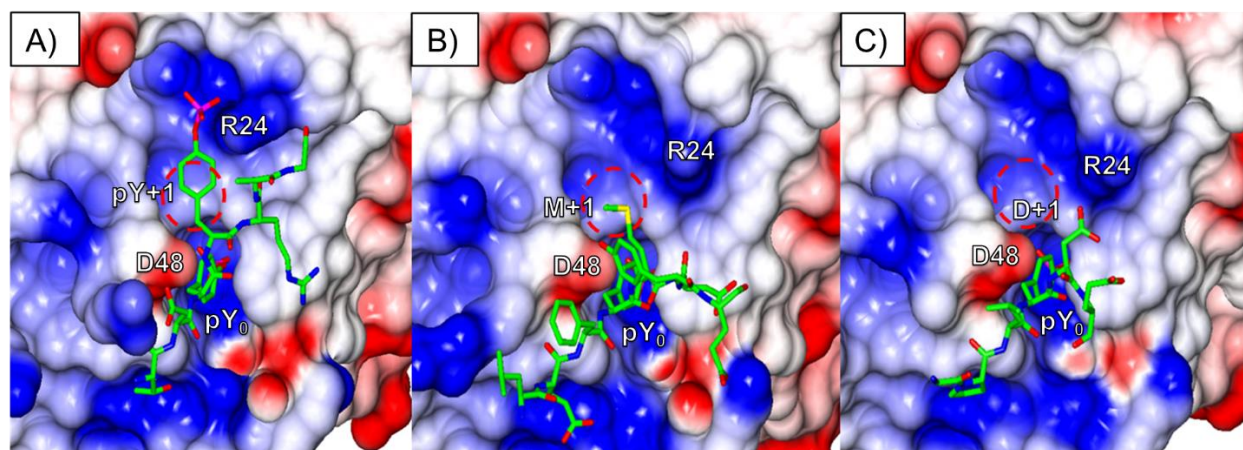

**Figure S4.** Interactions of different pY+1 residues with the amphipathic pocket on PTP1B. (A) PTP1B-insulin receptor peptide complex, where pY is the pY+1 residue (generated from pdb: 1G1H).<sup>3</sup> (B) PTP1B-consensus peptide complex, where the pY+1 residue is a Met (generated from pdb: 1EEO).<sup>4</sup> (C) PTP1B-nephrin peptide complex, where the pY+1 residue is an Asp. The broken red circle depicts the hydrophobic region of the amphipathic binding pocket.





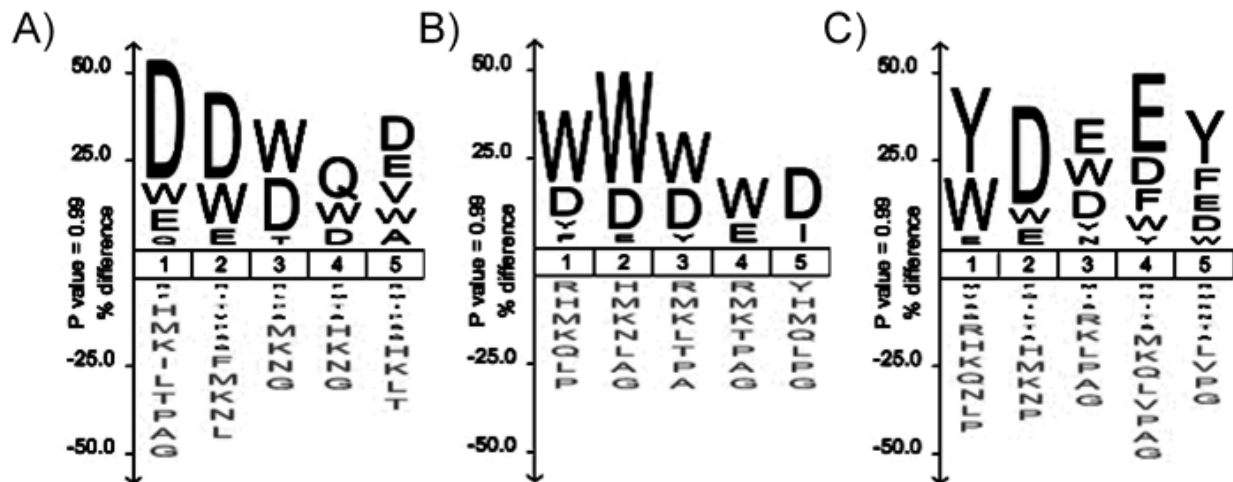

**Figure S6.** Icelogo plots showing the C-terminal selectivity of HePTP (A), TCPTP/Class I (B), and PTPD2/Class I (C) as determined by screening against Library IV. The y axis represents the percent difference between the selected peptides and naïve frequency of the peptide library at a given position within the peptide (pY+1 to pY+5, x axis). M, Nle; Y, F<sub>2</sub>Y.





## References:

1. Yu, X., Chen, M., Zhang, S., Yu, Z. H., Sun, J. P., Wang, L., Liu, S., Imasaki, T., Takagi, Y., and Zhang, Z. Y. (2011) Substrate specificity of lymphoid-specific tyrosine phosphatase (Lyp) and identification of Src kinase-associated protein of 55 kDa homolog (SKAP-HOM) as a Lyp substrate. *J. Biol. Chem.* *286*, 30526-30534.
2. Nam, H. J., Poy, F., Saito, H., and Frederick, C. A. (2005) Structural basis for the function and regulation of the receptor protein tyrosine phosphatase CD45. *J. Exp. Med.* *201*, 441-452.
3. Salmeen, A., Andersen, J. N., Myers, M. P., Tonks, N. K., and Barford, D. (2000) Molecular basis for the dephosphorylation of the activation segment of the insulin receptor by protein tyrosine phosphatase 1B. *Mol. Cell* *6*, 1401-1412.
4. Sarmiento, M., Puius, Y. A., Vetter, S. W., Keng, Y. F., Wu, L., Zhao, Y., Lawrence, D. S., Almo, S. C., and Zhang, Z. Y. (2000) Structural basis of plasticity in protein tyrosine phosphatase 1B substrate recognition. *Biochemistry* *39*, 8171-8179.
